# Supplementary material
Source: PubMed Central journal article supplement (PMC2649090)
Supplement: M808161200_1.pdf [file M808161200_1.pdf]

# Supplementary Data

## Mechanistic Studies of the Bypass of a Bulky Single-Base Lesion Catalyzed by a Y-Family DNA Polymerase

Shanen M. Sherrer<sup>1,2</sup>, Jessica A. Brown<sup>1,2</sup>, Lindsey R. Pack<sup>1</sup>, Vijay P. Jasti<sup>3</sup>, Jason D. Fowler<sup>1,2</sup>,  
Ashis K. Basu<sup>3</sup>, and Zucaí Suo<sup>1,2,4,5,6,\*</sup>

<sup>1</sup>Department of Biochemistry, <sup>2</sup>Ohio State Biochemistry Program, <sup>4</sup>Ohio State Biophysics Program, <sup>5</sup>Molecular, Cellular & Developmental Biology Program, <sup>6</sup>Comprehensive Cancer Center, The Ohio State University, Columbus, OH 43210

<sup>3</sup>Department of Chemistry, University of Connecticut, Storrs, CT 06269

**Supplementary Table 1.** Kinetic parameters of dNTP incorporation into undamaged DNA

|           | $K_d, \text{dNTP}$<br>( $\mu\text{M}$ ) | $k_p$<br>( $\text{s}^{-1}$ )     | $k_p/K_d, \text{dNTP}$<br>( $\mu\text{M}^{-1}\text{s}^{-1}$ ) | Fidelity <sup>a</sup>  |
|-----------|-----------------------------------------|----------------------------------|---------------------------------------------------------------|------------------------|
| 19/26-mer |                                         |                                  |                                                               |                        |
| dGTP      | 183 ± 54                                | 4.6 ± 0.4                        | 2.5 x 10 <sup>-2</sup>                                        | -                      |
| dATP      | 731 ± 175                               | (1.0 ± 0.1) x 10 <sup>-2</sup>   | 1.4 x 10 <sup>-5</sup>                                        | 5.6 x 10 <sup>-4</sup> |
| dCTP      | 350 ± 107                               | (5.0 ± 0.5) x 10 <sup>-2</sup>   | 1.4 x 10 <sup>-4</sup>                                        | 5.6 x 10 <sup>-3</sup> |
| dTTP      | 1440 ± 305                              | (1.3 ± 0.2) x 10 <sup>-2</sup>   | 8.9 x 10 <sup>-6</sup>                                        | 3.6 x 10 <sup>-4</sup> |
| 20/26-mer |                                         |                                  |                                                               |                        |
| dCTP      | 205 ± 64                                | 11.6 ± 0.9                       | 5.7 x 10 <sup>-2</sup>                                        | -                      |
| dATP      | 631 ± 136                               | (1.2 ± 0.1) x 10 <sup>-2</sup>   | 1.9 x 10 <sup>-5</sup>                                        | 3.3 x 10 <sup>-4</sup> |
| dGTP      | 77 ± 16                                 | (3.5 ± 0.2) x 10 <sup>-3</sup>   | 4.5 x 10 <sup>-5</sup>                                        | 7.9 x 10 <sup>-4</sup> |
| dTTP      | 489 ± 52                                | (4.0 ± 0.2) x 10 <sup>-2</sup>   | 8.3 x 10 <sup>-5</sup>                                        | 1.5 x 10 <sup>-3</sup> |
| 21/26-mer |                                         |                                  |                                                               |                        |
| dGTP      | 437 ± 19                                | 1.62 ± 0.03                      | 3.7 x 10 <sup>-3</sup>                                        | -                      |
| dATP      | 859 ± 168                               | (2.0 ± 0.2) x 10 <sup>-3</sup>   | 2.4 x 10 <sup>-6</sup>                                        | 6.5 x 10 <sup>-4</sup> |
| dCTP      | 701 ± 30                                | (2.14 ± 0.04) x 10 <sup>-2</sup> | 3.1 x 10 <sup>-5</sup>                                        | 8.3 x 10 <sup>-3</sup> |
| dTTP      | 1180 ± 144                              | (2.1 ± 0.2) x 10 <sup>-3</sup>   | 1.8 x 10 <sup>-6</sup>                                        | 4.9 x 10 <sup>-4</sup> |
| 22/26-mer |                                         |                                  |                                                               |                        |
| dCTP      | 129 ± 19                                | 4.4 ± 0.2                        | 3.4 x 10 <sup>-2</sup>                                        | -                      |
| dATP      | 1313 ± 154                              | (5.5 ± 0.4) x 10 <sup>-3</sup>   | 4.2 x 10 <sup>-6</sup>                                        | 1.2 x 10 <sup>-4</sup> |
| dGTP      | 567 ± 95                                | (4.8 ± 0.4) x 10 <sup>-3</sup>   | 8.5 x 10 <sup>-6</sup>                                        | 2.5 x 10 <sup>-4</sup> |
| dTTP      | 1340 ± 454                              | (1.5 ± 0.3) x 10 <sup>-2</sup>   | 1.1 x 10 <sup>-5</sup>                                        | 3.2 x 10 <sup>-4</sup> |
| 23/26-mer |                                         |                                  |                                                               |                        |
| dGTP      | 116 ± 24                                | 2.8 ± 0.1                        | 2.4 x 10 <sup>-2</sup>                                        | -                      |
| dATP      | 431 ± 25                                | (6.6 ± 0.1) x 10 <sup>-3</sup>   | 1.5 x 10 <sup>-5</sup>                                        | 6.2 x 10 <sup>-4</sup> |
| dCTP      | 918 ± 102                               | (1.5 ± 0.1) x 10 <sup>-3</sup>   | 1.6 x 10 <sup>-6</sup>                                        | 6.7 x 10 <sup>-5</sup> |
| dTTP      | 1220 ± 59                               | (3.8 ± 0.1) x 10 <sup>-3</sup>   | 3.1 x 10 <sup>-6</sup>                                        | 1.3 x 10 <sup>-4</sup> |

<sup>a</sup>Calculated as  $(k_p/K_d, \text{dNTP})_{\text{incorrect}} / [(k_p/K_d, \text{dNTP})_{\text{correct}} + (k_p/K_d, \text{dNTP})_{\text{incorrect}}]$ .

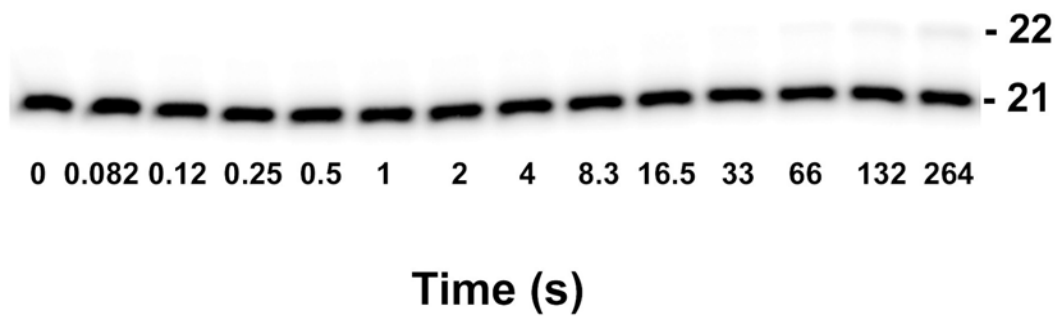

**Supplementary Fig. 1.** Effectiveness of the DNA trap for biphasic kinetic assays. A preincubated solution of Dpo4 (120 nM), 5'-[<sup>32</sup>P]-labeled 21/26-mer-dG<sup>AP</sup> (30 nM) and DNA trap (5 μM, 21/41-mer D-1) was rapidly mixed with dGTP (1.2 mM) and quenched at various time intervals with 0.37 M EDTA. The products were resolved on a 17% polyacrylamide gel with 8 M urea. The autoradiographed gel image revealed minimal product formation (22-mer) after 264 s. Thus, a molar ratio of 167:1 for the D-1 DNA trap to the radiolabeled damaged DNA substrate was effective at sequestering free Dpo4 that dissociated from the 5'-[<sup>32</sup>P]-labeled 21/26-mer-dG<sup>AP</sup>.
